# Supplementary material for: Ras/MAPK Modifier Loci Revealed by eQTL in Caenorhabditis elegans
Source: PubMed Central journal article supplement (PMC5592943; doi:10.1534/g3.117.1120), 2017-07-27

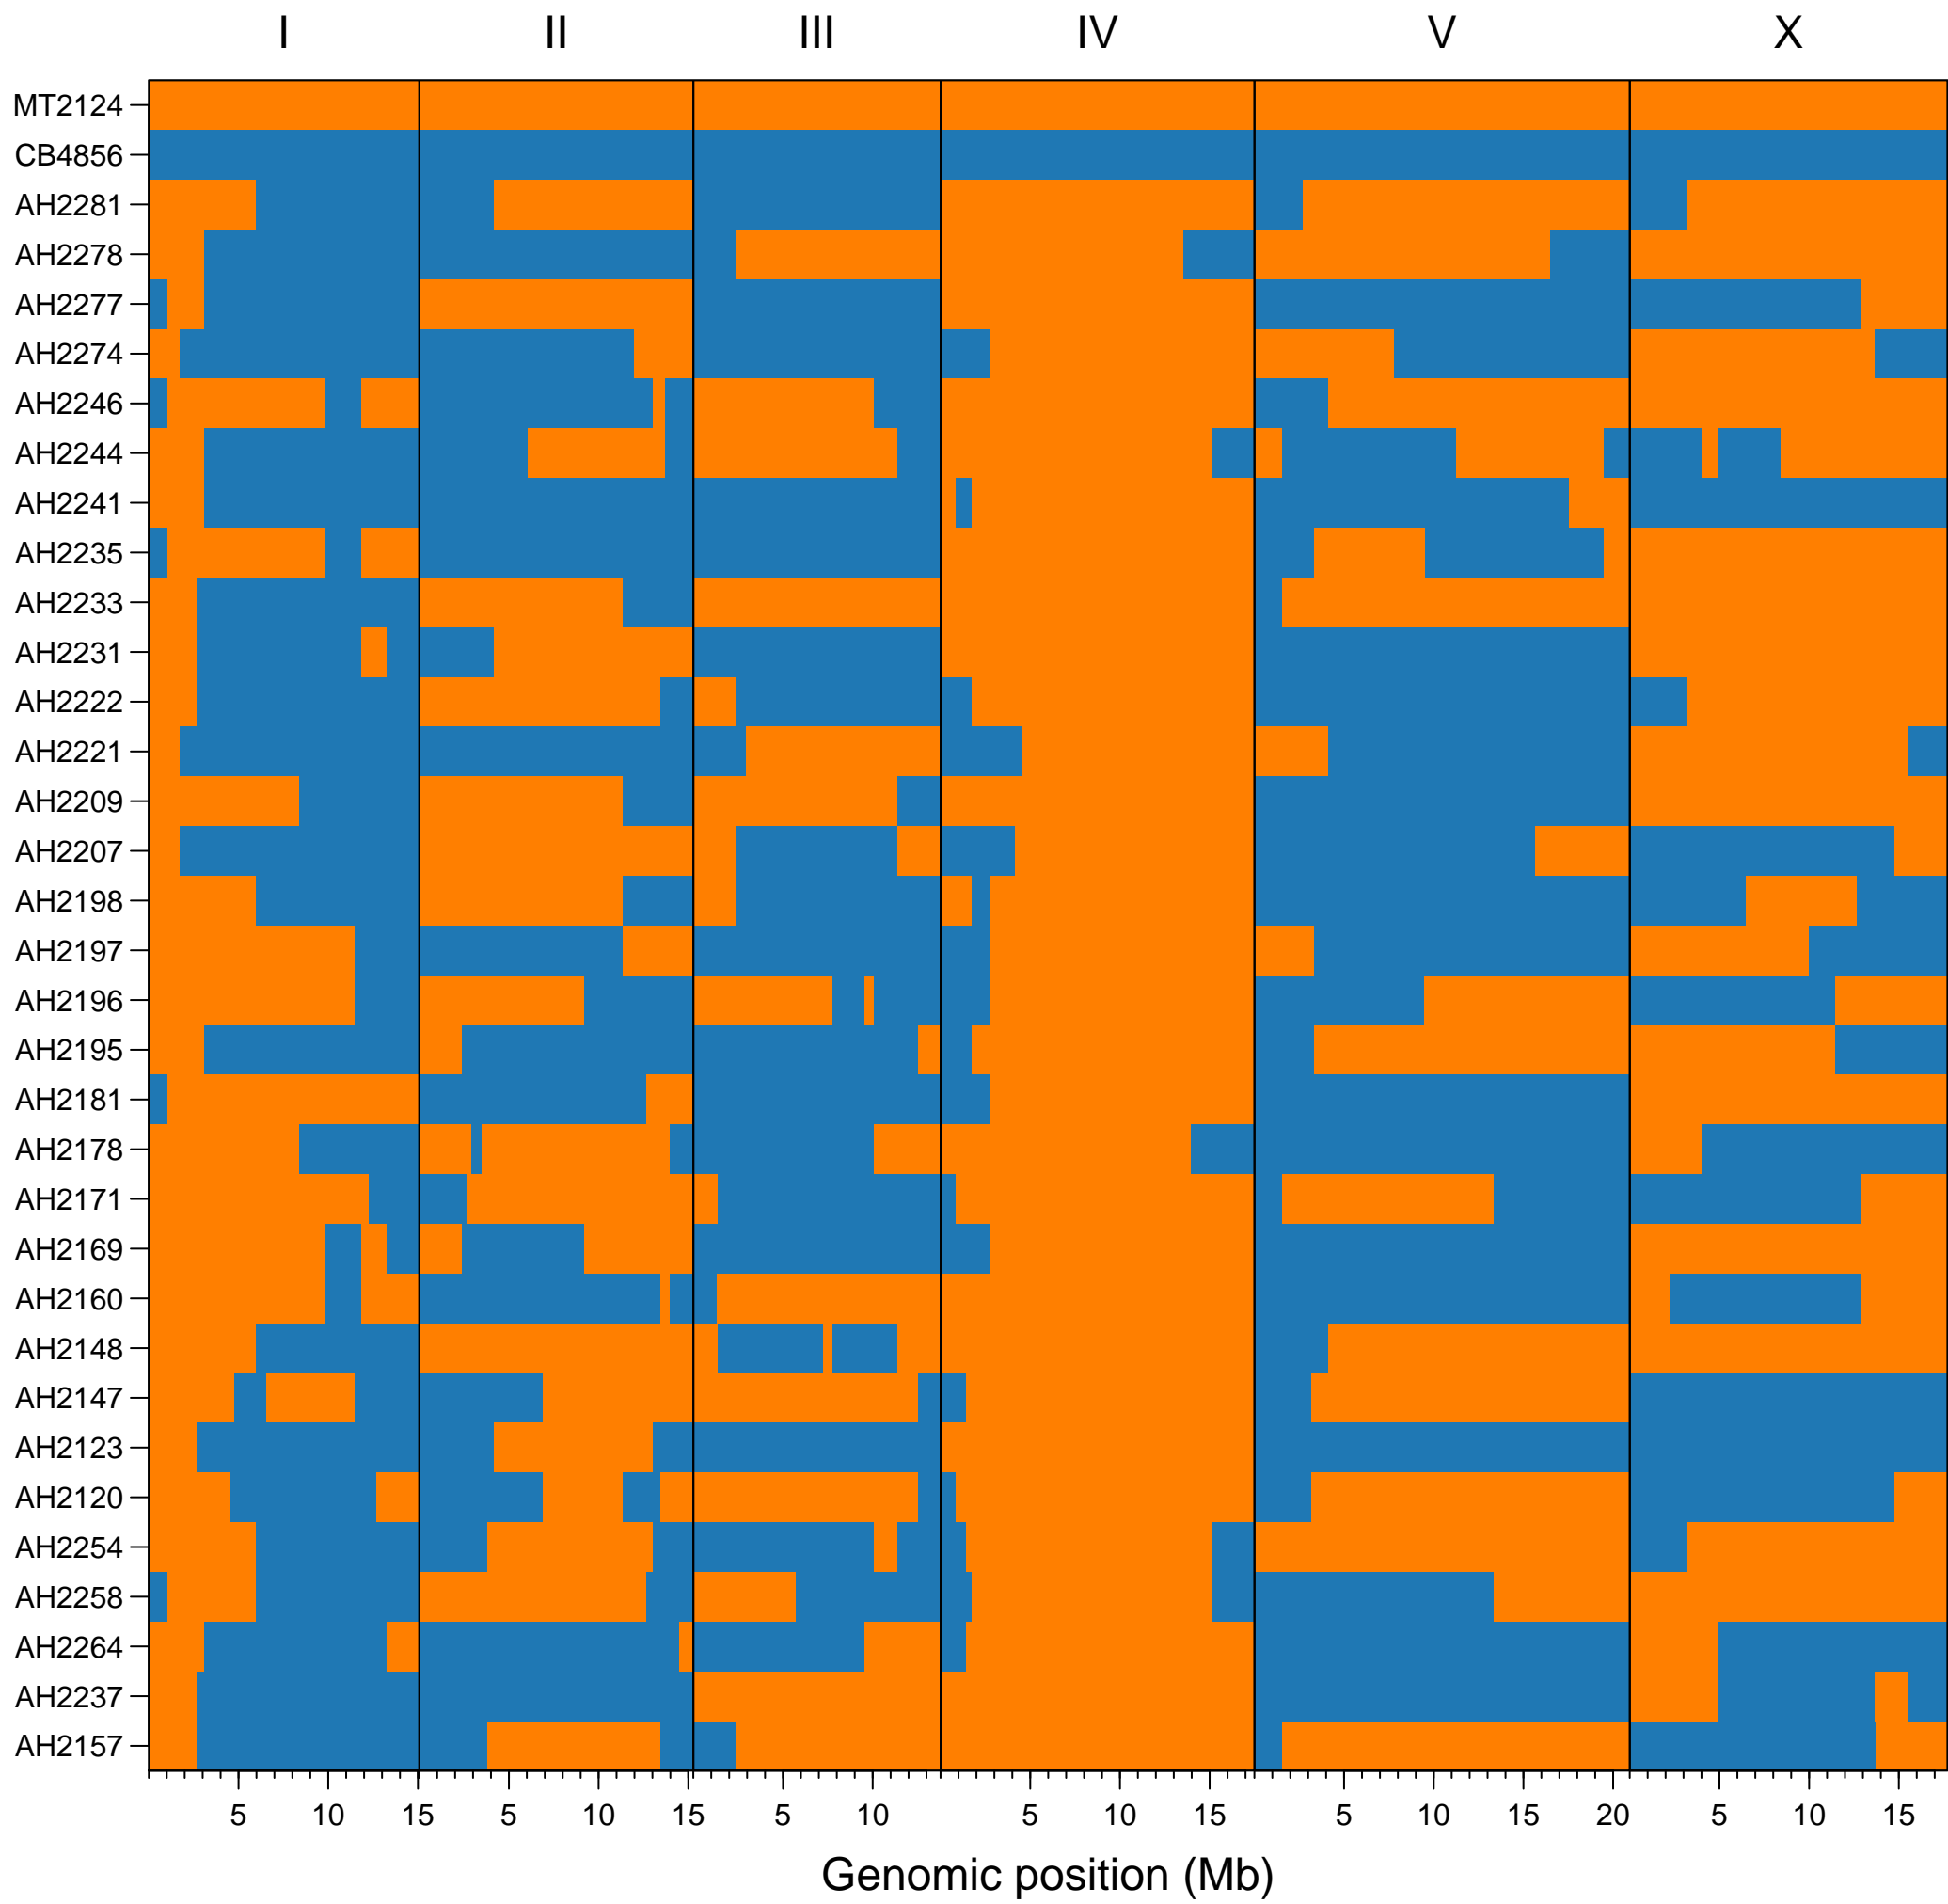

Supplement: 3185FigureS2.pdf [file 3185FigureS2.pdf]
